# Supplementary material for: Rationally Designed CdS-Based Ternary Heterojunctions: A Case of 1T-MoS2 in CdS/TiO2 Photocatalyst
Source: MDPI journal article supplement (doi:10.3390/nano11010038), 2020-12-25
Supplement: s1 [file s1]

## Supplementary Materials

# Rationally Designed CdS-Based Ternary Heterojunctions: A Case of 1T-MoS<sub>2</sub> in CdS/TiO<sub>2</sub> Photocatalyst

Wenqian Chen <sup>1,3,\*†</sup>, Shaomei Zhang <sup>1,2,†</sup>, Ganyu Wang <sup>1,2</sup>, Gang Huang <sup>4</sup>, Zhichong Yu <sup>1,2</sup>, Yirui Li <sup>1,2</sup> and Liang Tang <sup>1,2,\*</sup>

<sup>1</sup> Key Laboratory of Organic Compound Pollution Control Engineering, Ministry of Education, Shanghai 200444, China

<sup>2</sup> School of Environmental and Chemical Engineering, Shanghai University, Shanghai 200444, China; shao-meizhang@shu.edu.cn (S.Z.); wgy@shu.edu.cn (G.W.); zhichongyu@shu.edu.cn (Z.Y.); yiruili@shu.edu.cn (Y.L.)

<sup>3</sup> Shanghai Institute of Applied Radiation, Shanghai University, 20 Chengzhong Road, Shanghai 201800, China

<sup>4</sup> Physical Science and Engineering Division King Abdullah University of Science and Technology (KAUST), Thuwal 23955-6900, Saudi Arabia; gang.huang@kaust.edu.sa

\* Correspondence: wenqianchen@shu.edu.cn (W.C.); tang1liang@shu.edu.cn (L.T.)

† Equal contribution.

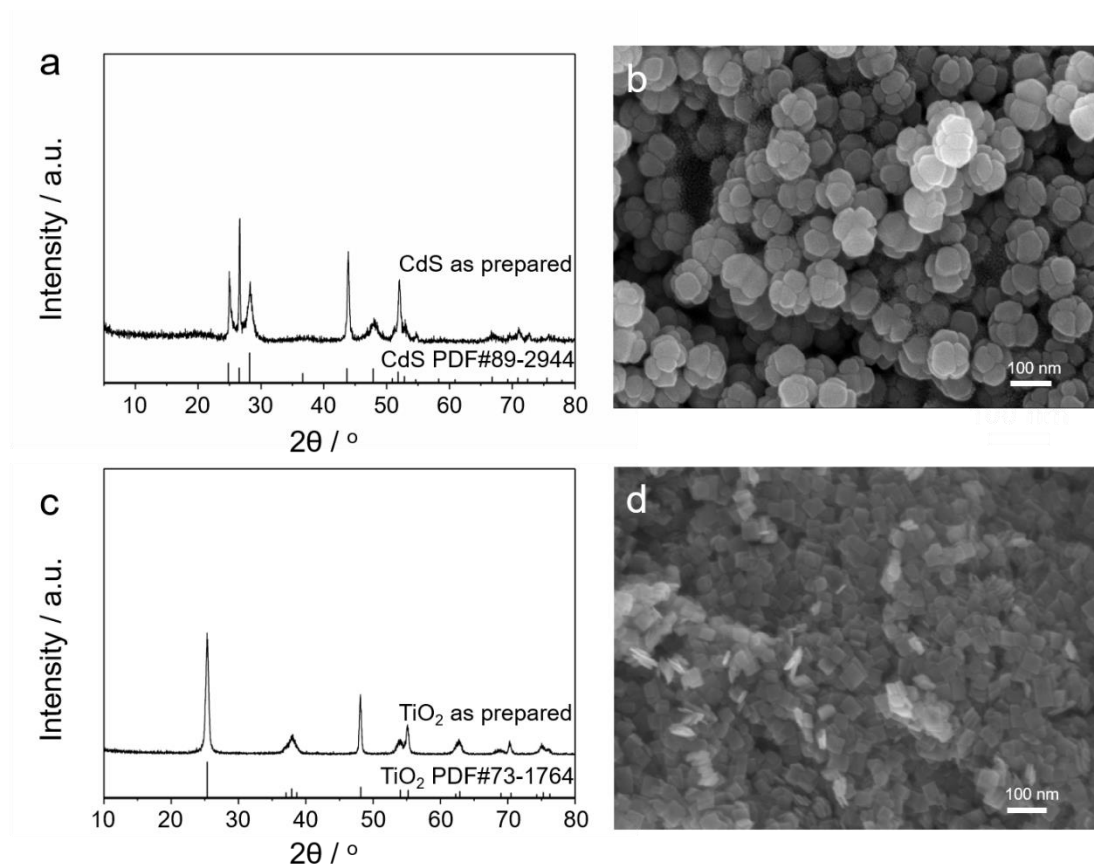

**Figure S1.** (a) XRD pattern and (b) SEM image of the pure CdS nanoparticles, (c) XRD pattern and (d) SEM image of the TiO<sub>2</sub> nanosheets.

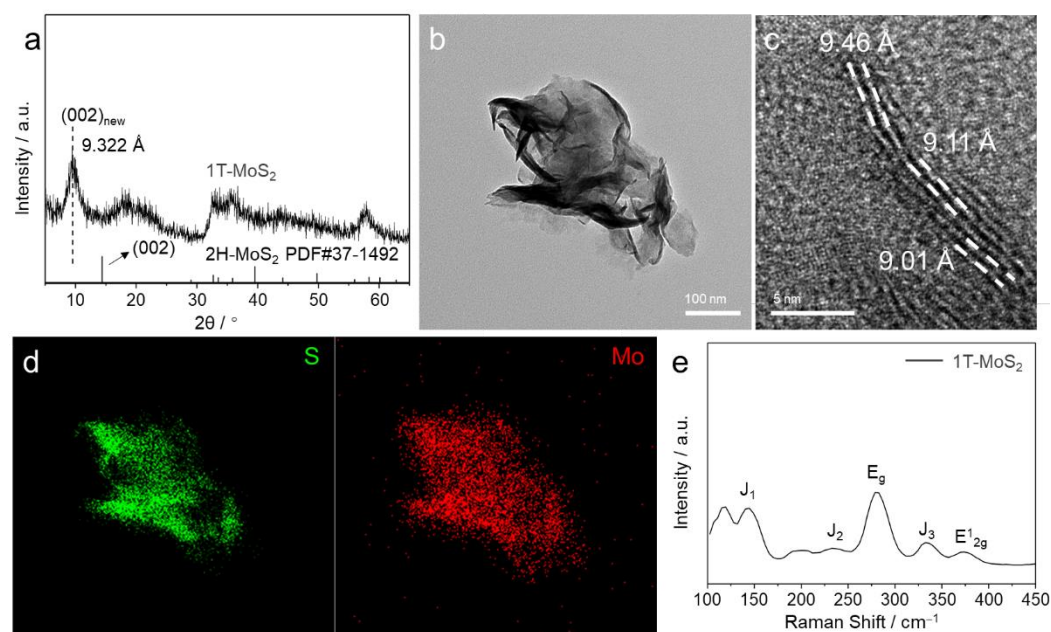

**Figure S2.** (a) XRD pattern, (b) TEM image, (c) HRTEM image, (d) EDS element mapping images of S, Mo, and (e) Raman spectra of 1T-MoS<sub>2</sub> nanosheets. Different with 2H phase (JCPDS card No. 37-1492), 002 peak of 1T phase shifted to a low angle of 9.48° (this is corresponding to an interlayer distance of 9.32 Å), and the second-order diffraction peak of 18.31° occurred simultaneously [1]. The d-spacing difference of 002 peak between the 2H and 1T phase is 3.17 Å, which is due to the intercalation of NH<sub>4</sub><sup>+</sup> between MoS<sub>2</sub> layers [2]. HRTEM shown the 1T-MoS<sub>2</sub> nanocrystals were composed of 3–6 layers, with the maximum interval of 9.46 Å, consistent with the XRD results. TEM mapping revealed the uniform distribution of Mo, S elements in the 1T-MoS<sub>2</sub> nanosheet. These results represent the successful synthesis of 1T-MoS<sub>2</sub>.

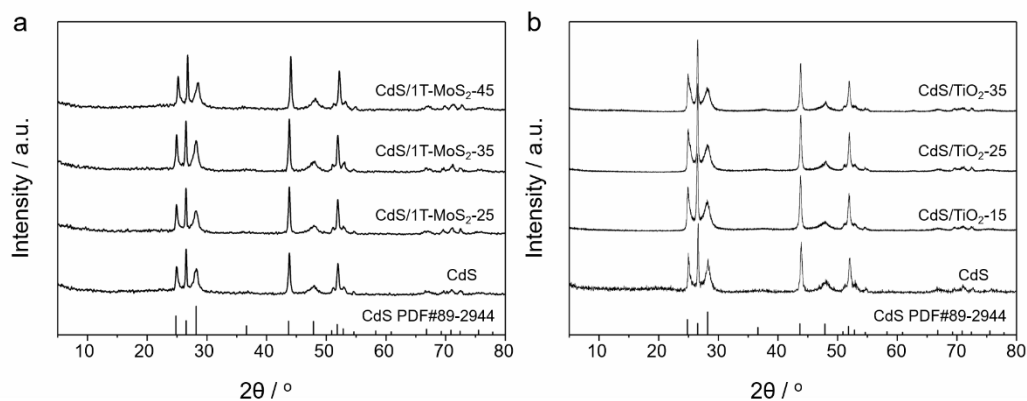

**Figure S3.** XRD patterns of binary heterojunctions CdS/1T-MoS<sub>2</sub> (a) and CdS/TiO<sub>2</sub> (b).

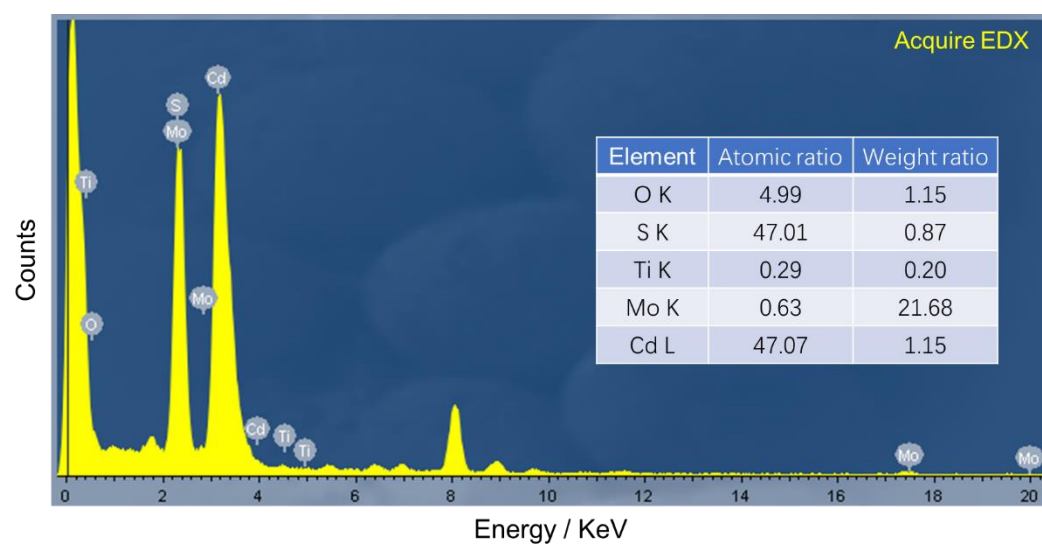

Figure S4. EDS spectrum of CdS/1T-MoS<sub>2</sub>/TiO<sub>2</sub>-45-15 heterojunctions.

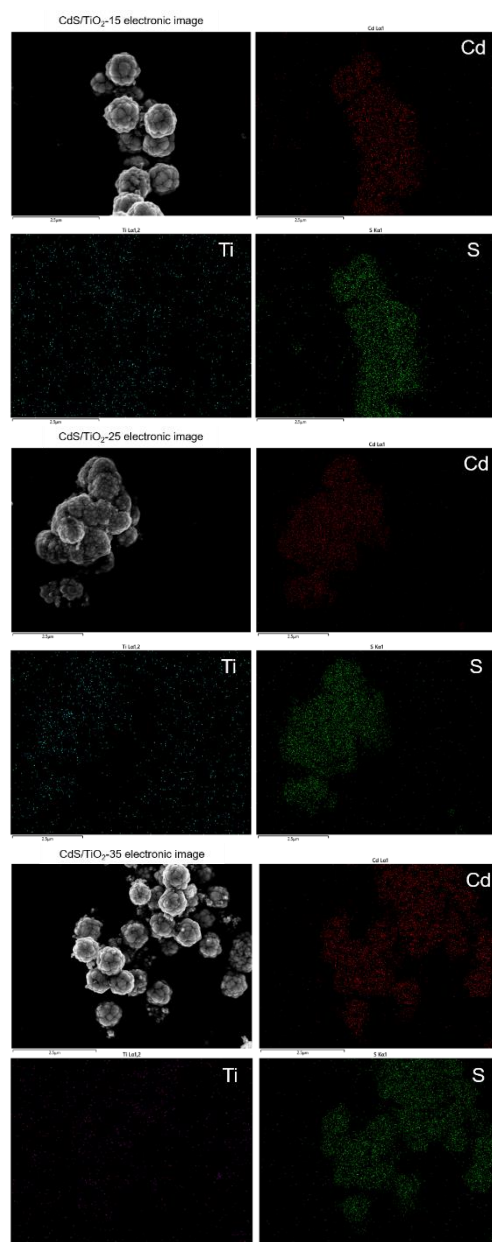

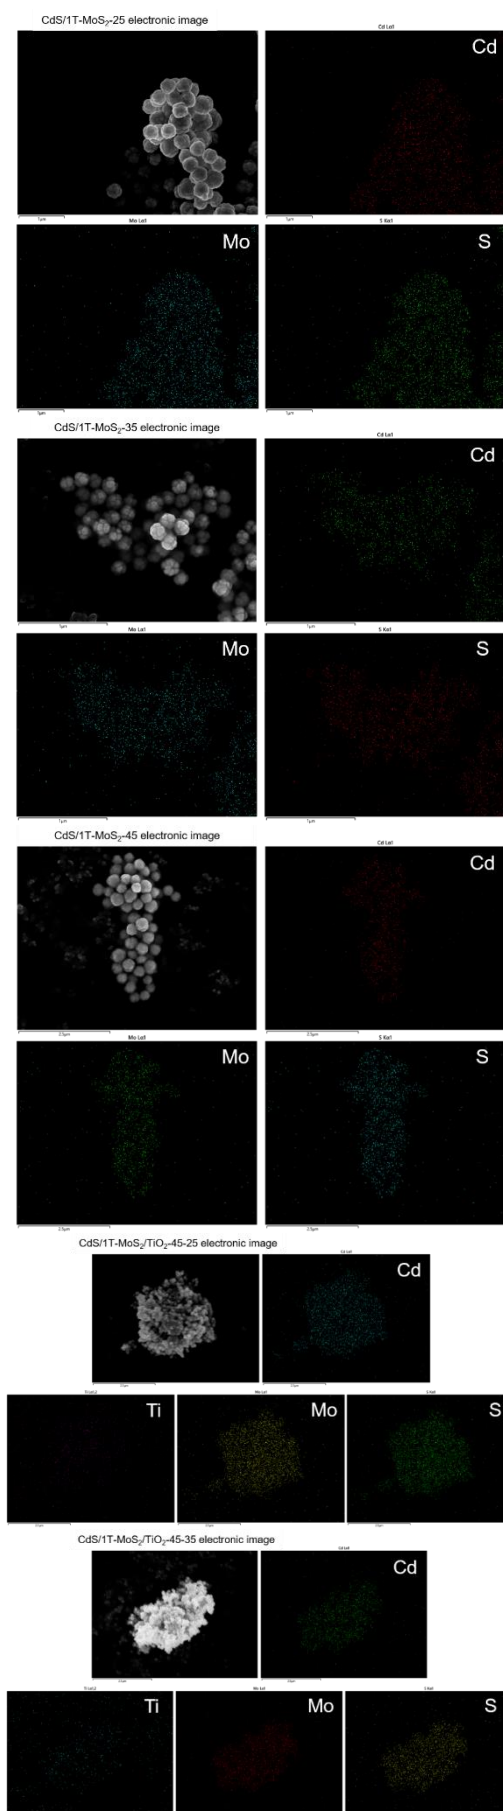

**Figure S5.** SEM-EDS image of CdS/ TiO<sub>2</sub>, CdS/1T-MoS<sub>2</sub> and CdS/1T-MoS<sub>2</sub>/TiO<sub>2</sub>. EDS element mapping shows the existence of Cd, S, Mo, Ti and their uniform distribution in the composites.

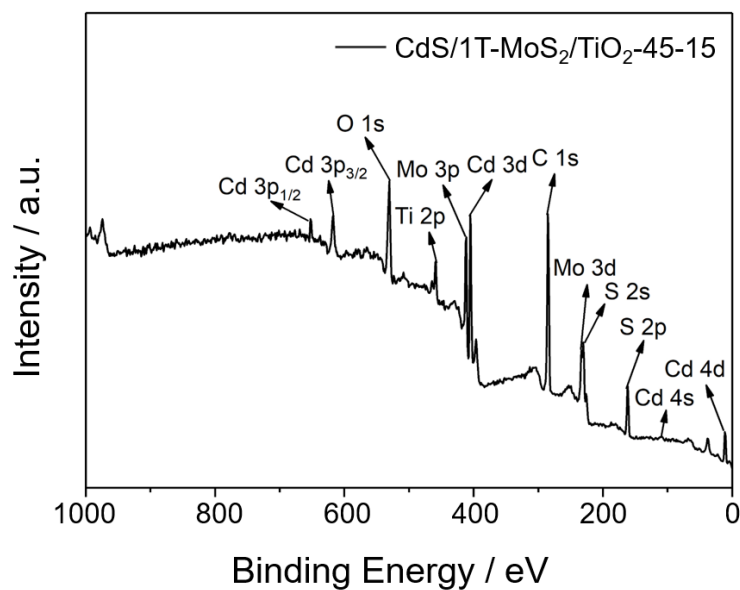

**Figure S6.** Full XPS spectrum of CdS/1T-MoS<sub>2</sub>/TiO<sub>2</sub>-45-15.

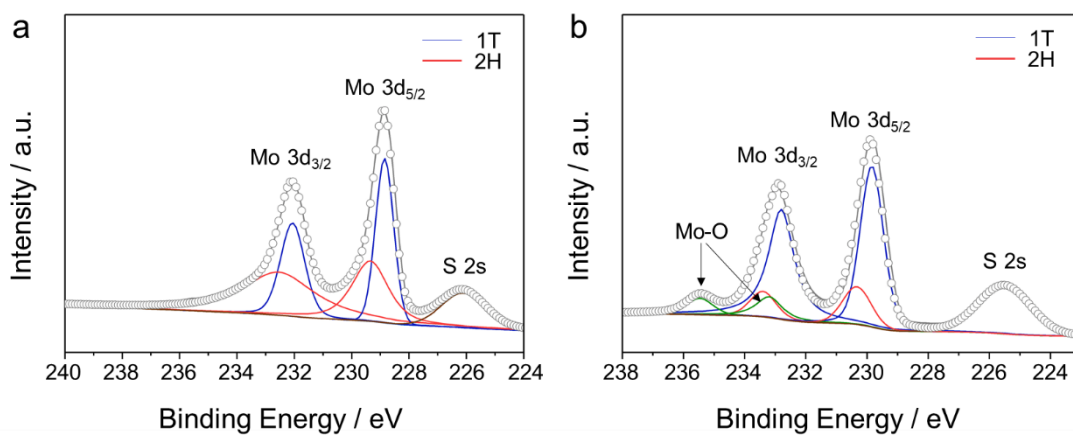

**Figure S7.** Deconvolutions of Mo 3d XPS analyses of 1T-MoS<sub>2</sub> (a) and CdS/1T-MoS<sub>2</sub>/TiO<sub>2</sub>-45-15 (b) samples.

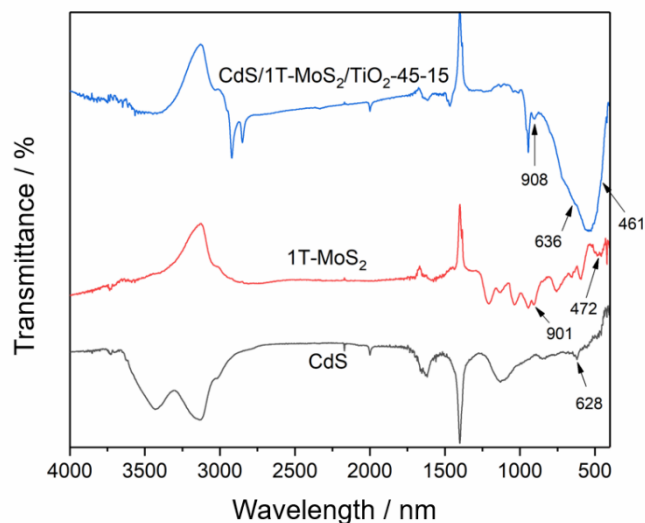

**Figure S8.** FTIR of pure CdS, 1T-MoS<sub>2</sub> and CdS/1T-MoS<sub>2</sub>/TiO<sub>2</sub>-45-15 nanocomposites. The IR characteristic peak of CdS at 628 cm<sup>-1</sup> is attributed to the stretching frequency of the Cd-S bond [3]. The peak around 472 cm<sup>-1</sup> was associated with Mo-S and the peaks at 901 cm<sup>-1</sup> were assigned to Mo-O vibrations of 1T-MoS<sub>2</sub> [4]. For CdS/1T-MoS<sub>2</sub>/TiO<sub>2</sub>-45-15, the corresponding Mo-S and Cd-S peaks were blue shifted. The characteristic peak at 461 cm<sup>-1</sup> is in accordance with the presence of Ti-O bond [5]. The Raman spectra (Figure 3a) also indicated that there are three the above-mentioned components in our composite.

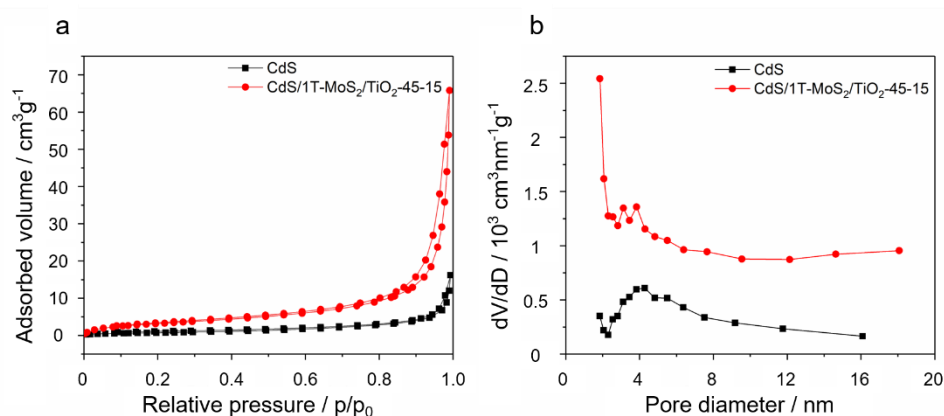

**Figure S9.** (a) Nitrogen sorption isotherms and (b) corresponding pore size distribution curves of CdS and CdS/1T-MoS<sub>2</sub>/TiO<sub>2</sub>-45-15. N<sub>2</sub> adsorption-desorption isotherms of CdS and CdS/1T-MoS<sub>2</sub>/TiO<sub>2</sub> demonstrate a typical type-IV curve, indicating a mesoporous structure of the composite. Brunauer-Emmett-Teller surface area and pore size of CdS nanoparticles are calculated to be  $\approx 2.85$  m<sup>2</sup> g<sup>-1</sup> and 26.78 nm, respectively, which are smaller than that of CdS/1T-MoS<sub>2</sub>/TiO<sub>2</sub> heterojunction ( $\approx 12.31$  m<sup>2</sup> g<sup>-1</sup> and 31.43 nm, respectively), revealing the successful loading of 1T-MoS<sub>2</sub> and TiO<sub>2</sub> on the mesoporous CdS.

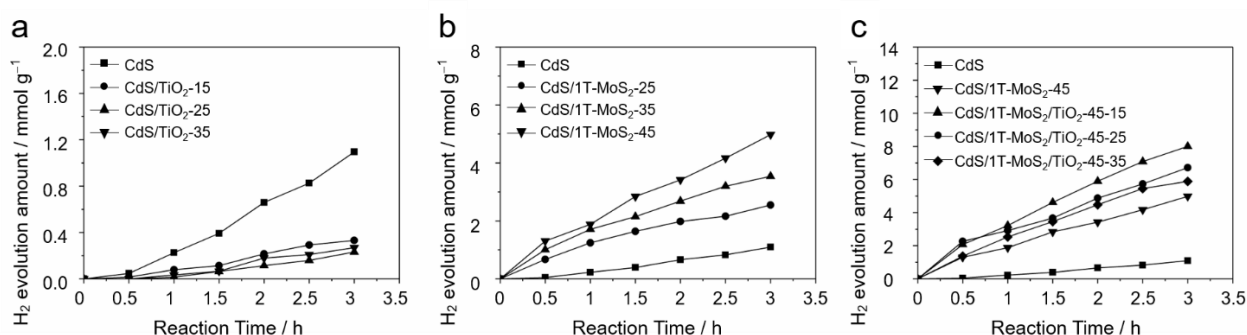



**Figure S10.** Total amount of photocatalytic hydrogen production in 3h of (a) CdS/TiO<sub>2</sub>, (b) CdS/1T-MoS<sub>2</sub>, and (c) CdS/1T-MoS<sub>2</sub>/TiO<sub>2</sub>.

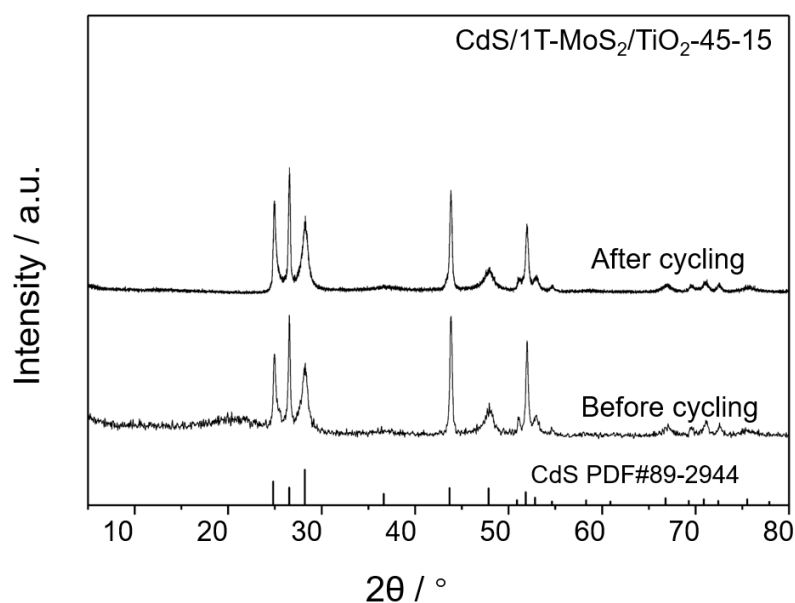

**Figure S11.** XRD pattern after hydrogen production cycle of CdS/1T-MoS<sub>2</sub>/TiO<sub>2</sub>-45-15.

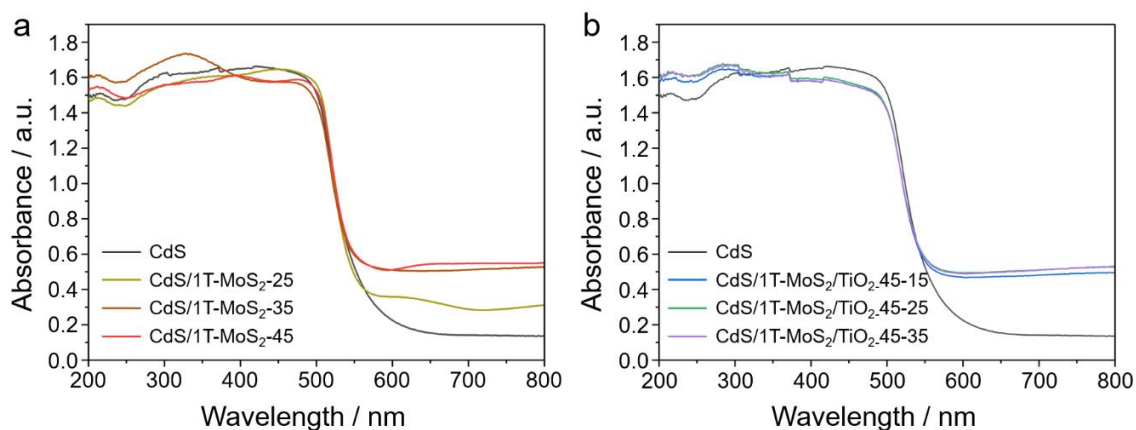

**Figure S12.** UV-vis diffuse reflectance spectra (DRS) of (a) binary CdS/1T-MoS<sub>2</sub> and (b) ternary CdS/1T-MoS<sub>2</sub>/TiO<sub>2</sub>.

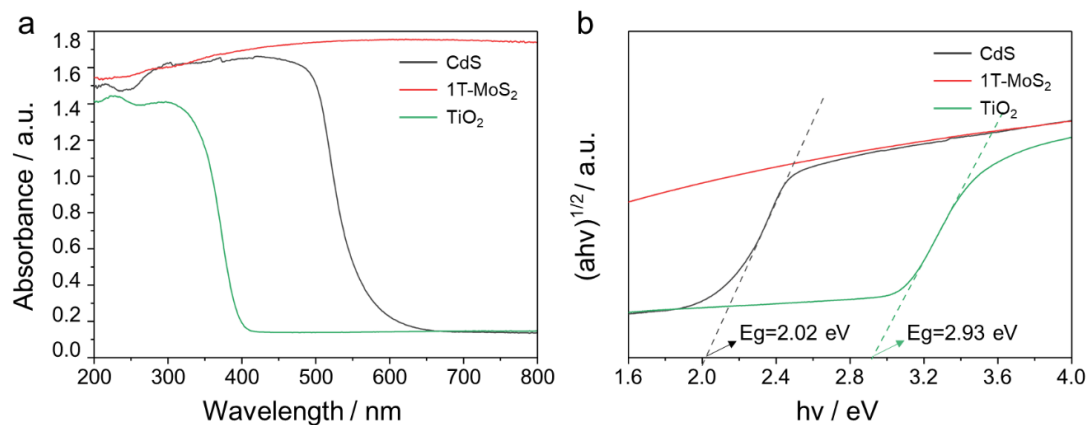

**Figure S13.** (a) UV-vis diffuse reflectance spectra (DRS) and (b) The plot of  $(\alpha h\nu)^{1/2}$  vs photo energy ( $h\nu$ ) of CdS, 1T-MoS<sub>2</sub> and TiO<sub>2</sub>.

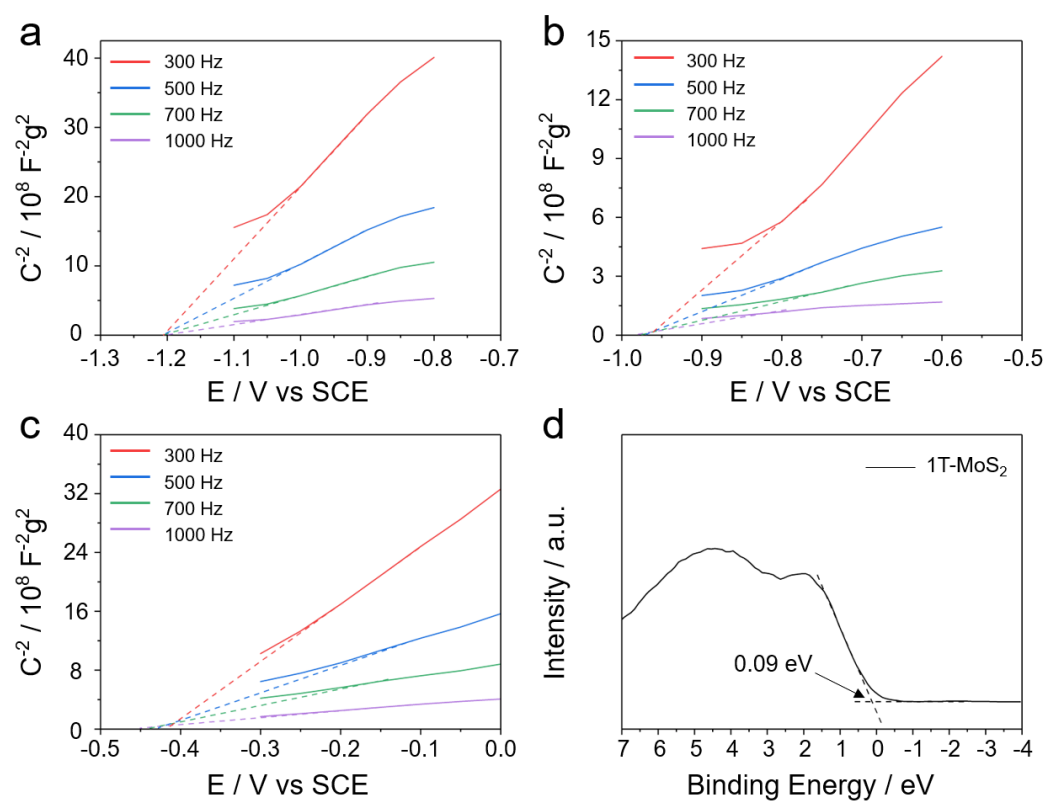

**Figure S14.** Mott-Schottky plots at different frequencies of (a) CdS, (b) TiO<sub>2</sub>, and (c) 1T-MoS<sub>2</sub>. (d) XPS-VB spectra of 1T-MoS<sub>2</sub>.

## Reference

1. M.Wu.; J.Zhan.; K.Wu.; Z.Li.; L.Wang.; B.Geng.; L.Wang.; D.Pan.; *J. Mater. Chem. A* **2017**, *5*, 14061–14069.
2. A.Anto.Jeffery.; C.Nethravathi.; M.Rajamathi.; *J. Phys. Chem. C* **2014**, *118*, 1386–1396.
3. L. Zhang.; X. Li.; Z. Mu.; J. Miao.; K. Wang.; R. Zhang.; S. Chen.; *RSC Advances* **2018**, *8*, 30747–30754.
4. J. Panda.; B. Tudu.; *AIP Conference Proceedings* **2018**, *1953*, 030127.
5. Mahalingam, T.; Selvakumar, C.; Ranjith Kumar, E.; Venkatachalam, T. *Physics Letters A* **2017**, *381*, 1815–1819.
